# Supplementary material for: How do transition-metal-substituted POMs modify the photoanode of dye-sensitized solar cells? A DFT study
Source: Royal Society of Chemistry journal article supplement (doi:10.1039/c8qi01336e), 2019-01-01
Supplement: c8qi01336e1.pdf [file c8qi01336e1.pdf]

## **Supporting Information**

### **How Do Transition-Metal-Substituted POMs Modify Photoanode of Dye-Sensitized Solar Cells? A DFT Study**

Yu Gao, Li-Kai Yan,\* Wei Guan,\* and Zhong-Min Su

Institute of Functional Material Chemistry, National & Local United Engineering Lab for Power Battery, Key Laboratory of Polyoxometalate Science of Ministry of Education, Faculty of Chemistry, Northeast Normal University, Changchun 130024, P. R. China, Fax: +86-431-5684009.

\* Corresponding author, E-mail address: yanlk924@nenu.edu.cn.

## 1.1 Details about the heat maps of transition density matrix (TDM)

*The TDM can be contracted to atom based form according to correspondence between basis functions and atoms, it will be symbolized as  $p$ . In Multiwfn, below construction ways are available:*

$$\text{Way 1: } p_{AB} = \sum_{\mu \in A} \sum_{\nu \in B} (P_{\mu\nu}^{\text{tran}})^2$$

$$\text{Way 2: } p_{AB} = \sqrt{\sum_{\mu \in A} \sum_{\nu \in B} (P_{\mu\nu}^{\text{tran}})^2}$$

$$\text{Way 3: } p_{AB} = \sum_{\mu \in A} \sum_{\nu \in B} |P_{\mu\nu}^{\text{tran}}|$$

$$\text{Way 4: } p_{AA} = \sum_{\mu \in A} |P_{\mu\mu}^{\text{tran}}|, \quad p_{A \neq B}^{\text{tran}} = \sqrt{\sum_{\mu \in A} \sum_{\nu \in B} (P_{\mu\nu}^{\text{tran}})^2}$$

*where  $\mu$  and  $\nu$  denote the basis functions centered at atom A and on B, respectively.*

*Both original form and symmetrized form of TMD could be employed here.*

*If way 1 is employed, the  $p$  will correspond to the matrix of so-called correlated electron-hole probability diagram (CEHPD), its (A,B) element was interpreted as the probability of simultaneously finding a hole in atom A and an electron in atom B (this interpretation is not strictly true in general cases).*

*If the  $p$  are constructed in way 2, 3 or 4, the resulting matrix may be referred to as atom transition density matrix. For example, the way 4 has been employed in Chem. Rev., **102**, 3171 (2002). However, using way 2 or 3 is more preferred because that the diagonal terms obtained in way 4 is often too large compared to the off-diagonal terms.*

*Assume that the TDM used to construct  $p$  was not symmetrized, the general structure of the resulting  $p$  could be expressed in below form*

$$p \equiv \begin{matrix} \text{electron} \\ \begin{bmatrix} 1,N & 2,N & L & N,N \\ M & M & N & M \\ 1,2 & 2,2 & L & N,2 \\ 1,1 & 2,1 & L & N,1 \end{bmatrix} \\ \text{hole} \end{matrix}$$

*In complete analogy with the discussion about TDM, the physical meaning of the matrix elements of  $p$  can be roughly understood as follows, irrespective of the choice of the specific way of constructing the  $p$ :*

- *Diagonal terms: If  $(A,A)$  is large, it implies that atom  $A$  has large contribution to both hole and electron, therefore the electron excitation should result in evident charge reorganization within atom  $A$ .*

- *Off-diagonal terms: If  $(A,B)$  is large, then atom  $A$  should have large contribution to hole and meantime atom  $B$  should have large contribution to electron, implying that electron excitation leads to CT from  $A$  to  $B$ .*

*If symmetrized form of TDM was used to build  $p$ , then CT directional information will not be reflected by  $p$ . In this case, if off-diagonal term  $(A,B)=(B,A)$  is large, then we can simply say that coherence between atoms  $A$  and  $B$  is strong during the electron excitation, in other words, charge transfer occurs between atoms  $A$  and  $B$ . The heat map of  $p$  is particularly useful for analyzing large-size and highly conjugated molecules.*

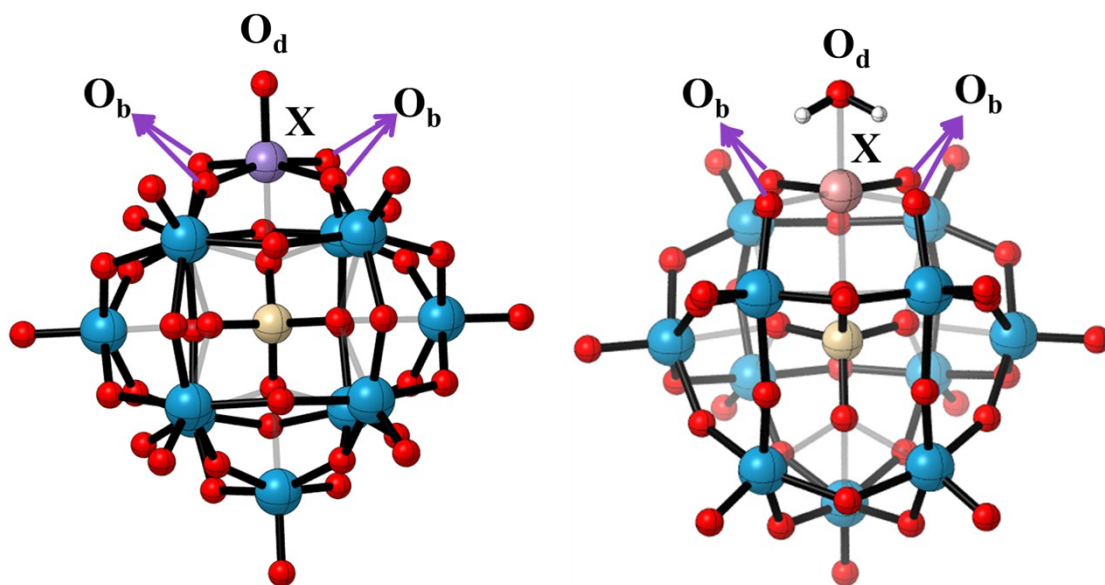

**Figure S1.** Geometrical structures of  $\text{SiW}_{11}\text{X}^{n-}$ .  $\text{X} = \text{Mn}^{4+}$ ,  $\text{Mn}^{6+}$ ,  $\text{Ru}^{6+}$ ,  $\text{Re}^{6+}$  and  $\text{Os}^{6+}$  (left),  $\text{X} = \text{Fe}^{2+}$ ,  $\text{Fe}^{3+}$ ,  $\text{Co}^{2+}$  and  $\text{Ni}^{2+}$  (right).

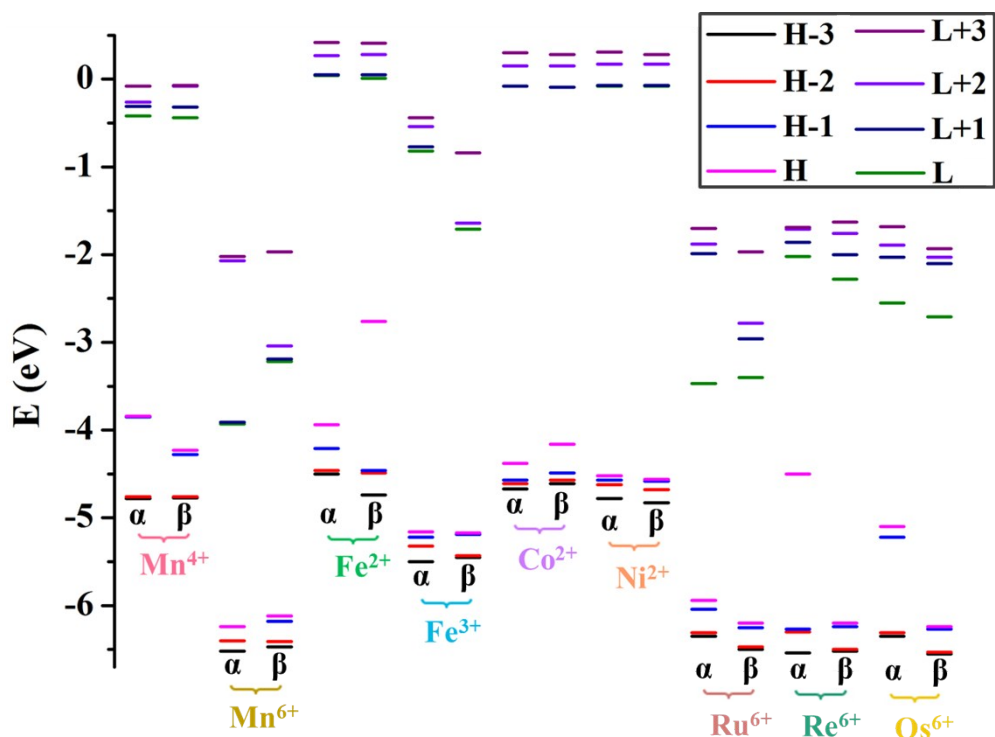

**Figure S2.** The energy level diagram of  $\text{SiW}_{11}\text{X}^{n-}$  ( $X = \text{Mn}^{4+}$ ,  $\text{Mn}^{6+}$ ,  $\text{Fe}^{2+}$ ,  $\text{Fe}^{3+}$ ,  $\text{Co}^{2+}$ ,  $\text{Ni}^{2+}$ ,  $\text{Ru}^{6+}$ ,  $\text{Re}^{6+}$  and  $\text{Os}^{6+}$ ).

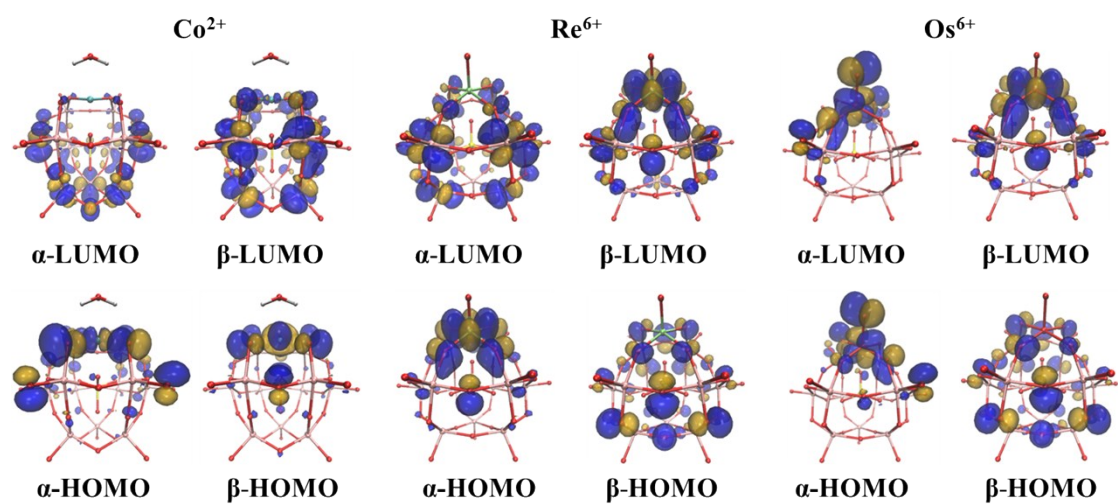

**Figure S3.** The frontier molecular orbital diagrams of  $\text{SiW}_{11}\text{X}^{n-}$  ( $\text{X} = \text{Co}^{2+}$ ,  $\text{Re}^{6+}$  and  $\text{Os}^{6+}$ ).

**Table S1.** The bond lengths of substituted transition metals (X) and oxygens (O<sub>b</sub> and O<sub>d</sub>) in SiW<sub>11</sub>X<sup>n-</sup> (X = Mn<sup>4+</sup>, Mn<sup>6+</sup>, Fe<sup>2+</sup>, Fe<sup>3+</sup>, Co<sup>2+</sup>, Ni<sup>2+</sup>, Ru<sup>6+</sup>, Re<sup>6+</sup> and Os<sup>6+</sup>) and the ionic radius (IR) for corresponding X.

| X                | X–O <sub>b</sub> | X–O <sub>d</sub> | IR   |
|------------------|------------------|------------------|------|
| Mn <sup>4+</sup> | 1.917~1.965      | 1.653            | 0.53 |
| Mn <sup>6+</sup> | 1.741~1.902      | 1.556            | 0.39 |
| Fe <sup>2+</sup> | 2.076~2.108      | 2.219            | 0.77 |
| Fe <sup>3+</sup> | 1.952~2.009      | 2.168            | 0.63 |
| Co <sup>2+</sup> | 2.020~2.151      | 2.281            | 0.72 |
| Ni <sup>2+</sup> | 2.021~2.094      | 2.248            | 0.63 |
| Ru <sup>6+</sup> | 1.848~2.026      | 1.727            | 0.70 |
| Re <sup>6+</sup> | 1.908~1.946      | 1.692            | 0.69 |
| Os <sup>6+</sup> | 1.862~1.999      | 1.741            | 0.69 |

**Table S2.** Excitation energy  $E_v$  (eV), maximum absorption wavelengths  $\lambda_{\max}$  (nm), and oscillator strengths  $f$  of  $\text{SiW}_{11}\text{Co}^{6-}$  by different functionals.

| $\text{SiW}_{11}\text{Co}^{6-}$ | $E_v$ | $\lambda_{\max}$ | $f$   |
|---------------------------------|-------|------------------|-------|
| Exp.                            | 4.88  | 254              | —     |
| PBE0                            | 4.35  | 285              | 0.035 |
|                                 | 4.77  | 260              | 0.028 |
| M06-2X                          | 5.28  | 235              | 0.103 |
|                                 | 5.04  | 246              | 0.046 |



**Table S3.** The relationship of the redox potentials  $E_{\text{red}}$  (eV) and the H–L gaps (eV) and the maximum absorption wavelengths  $\lambda_{\text{max}}$  (nm) for  $\text{SiW}_{11}\text{X}^{4-}$  (X =  $\text{Mn}^{6+}$ ,  $\text{Ru}^{6+}$  and  $\text{Os}^{6+}$ ).

| system                          | $E_{\text{red}}$ | H–L gaps | $\lambda_{\text{max}}$ |
|---------------------------------|------------------|----------|------------------------|
| $\text{SiW}_{11}\text{Mn}^{4-}$ | 2.20             | 2.31     | 332                    |
| $\text{SiW}_{11}\text{Ru}^{4-}$ | 1.62             | 2.47     | 248                    |
| $\text{SiW}_{11}\text{Os}^{4-}$ | 0.84             | 2.55     | 232                    |
